# Supplementary material
Source: PubMed Central journal article supplement (PMC2878501)
Supplement: supp_M110.112813_jbc.M110.112813-1.pdf [file supp_M110.112813_jbc.M110.112813-1.pdf]

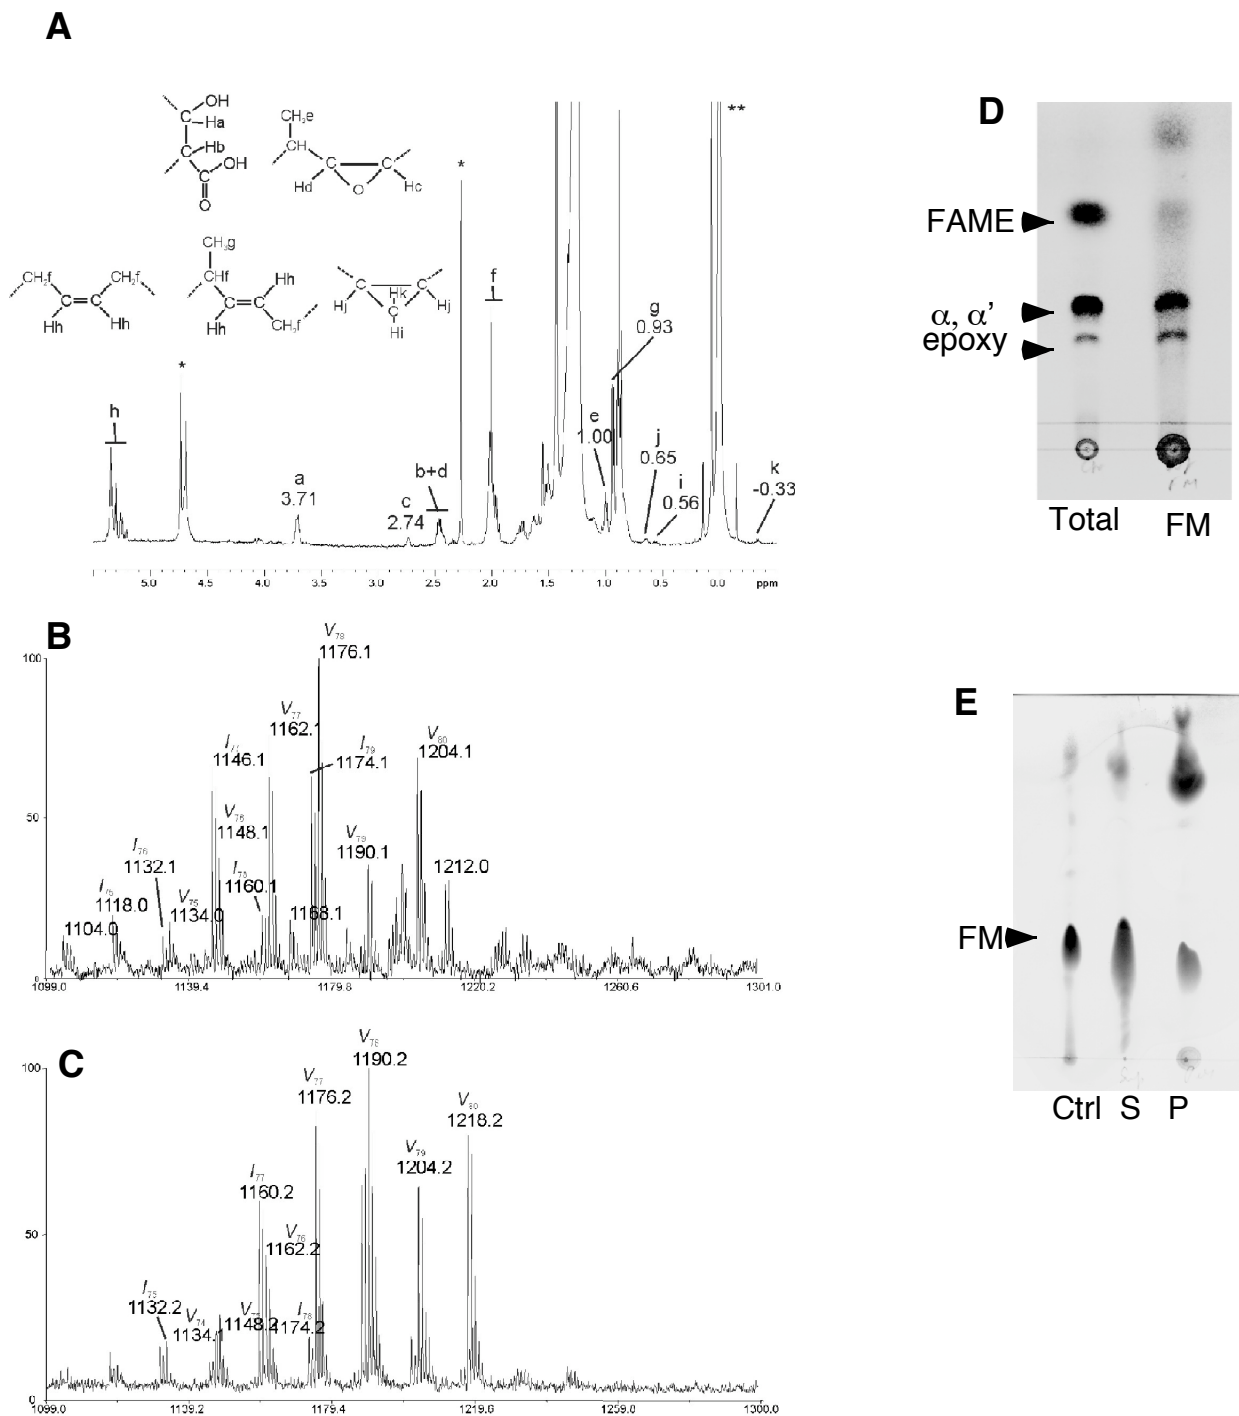

Fig S1: **(A)**-  $^1\text{H}$ -NMR spectrum of purified Spot 1. Proton signals associated to functional groups, including saturations,  $\leq$ -hydroxy and epoxy groups were labeled accordingly from (a) to (h). **(B)**. MALDI-TOF-MS spectrum of native Spot1. **(C)**. MALDI-TOF-MS spectrum of methyl esterified Spot 1. Individual signals were associated to  $[\text{M}+\text{Na}]^+$  adducts of  $\pm$ -mycolates (I) and epoxy-mycolates (V) according to previously published data (Alahari et al., 2007, Laval et al., 2001). **(D)**- TLC of methyl esters of Spot 1 (FM) compared with the methyl ester of total cellular mycolates of *M. smegmatis* (Total) containing alpha, alpha', epoxy mycolates as well as fatty acyl methyl esters (FAME). **(E)**- TLC of apolar lipids extracted from the supernatant (S) and cell pellet (P) after solubilization of *M. smegmatis*

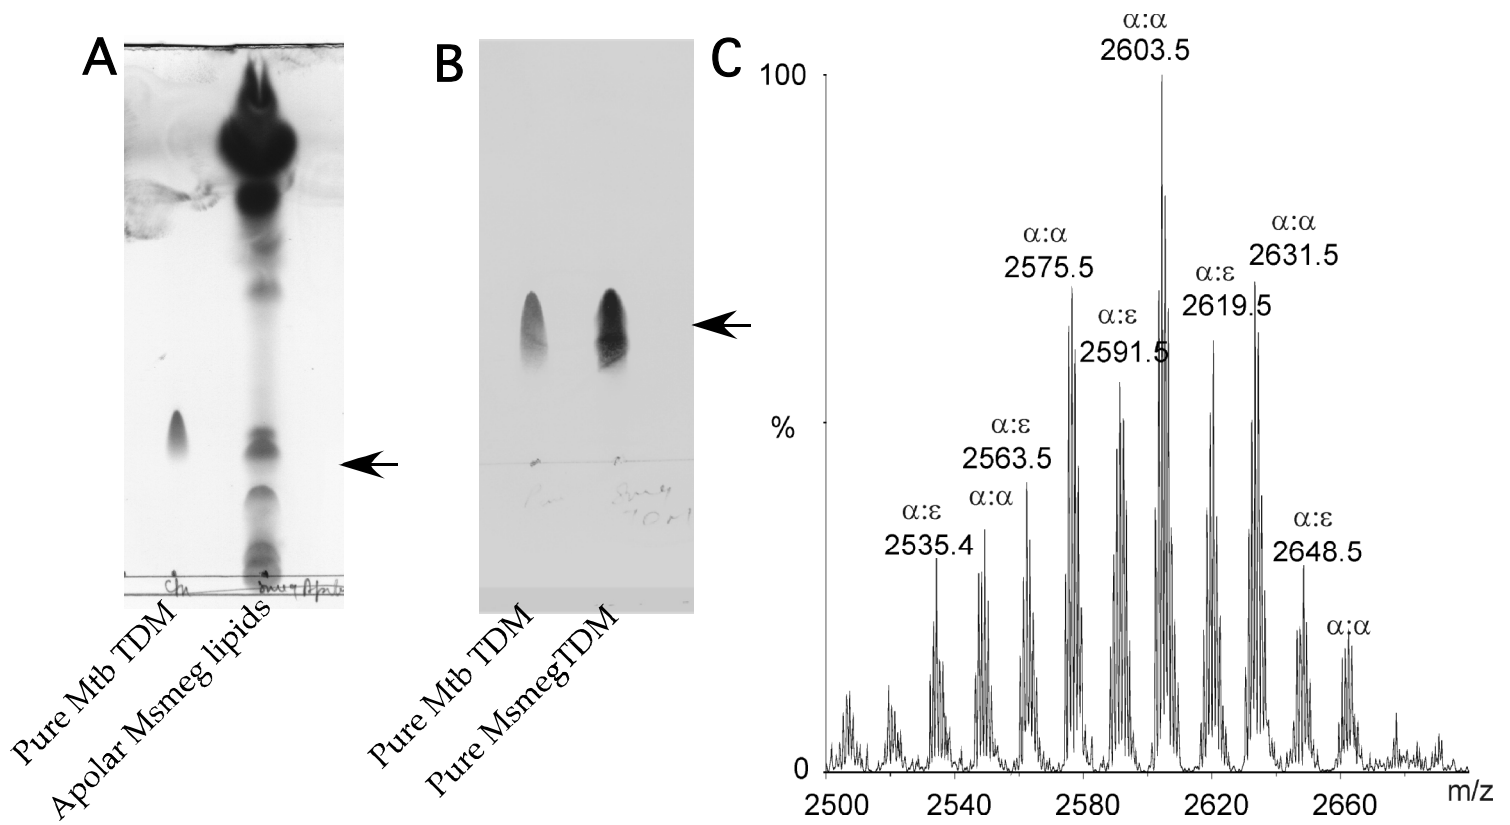

**Figure S2- A-** Purification and characterization of Trehalose dimycolate (TDM) from *M. smegmatis*. Thin layer chromatography (TLC) of TDM containing apolar lipids from *M. smegmatis* biofilms extracted in petroleum ether. The TLC was developed in chloroform:methanol:water::90:10:1, sprayed with 0.5% molybdophosphoric acid and charred for visualization. Purified Trehalose Dimycolate from *M. tuberculosis* (Sigma) was loaded as reference. **B-** TLC of the purified lipid co-migrating with Mtb TDM in panel A (marked with arrow). The lipid was extracted from TLC in chloroform:methanol::2:1. **C-** MALDI-TOF-MS analysis of purified *M. smegmatis* TDM as shown in panel B (marked with arrow). Spectrum shows complex pattern of signals attributed to  $[M+Na]^+$  adducts of a mixture of TDM differentially substituted by alpha-mycolates and epoxy mycolates. The two main families that can be observed are either exclusively substituted by alpha-mycolates (a:a) or by a mixture of epoxy and alpha-mycolates (e:a). Presence of both types of mycolates was also confirmed by  $^1\text{H-NMR}$  analysis of intact TDM (not shown).

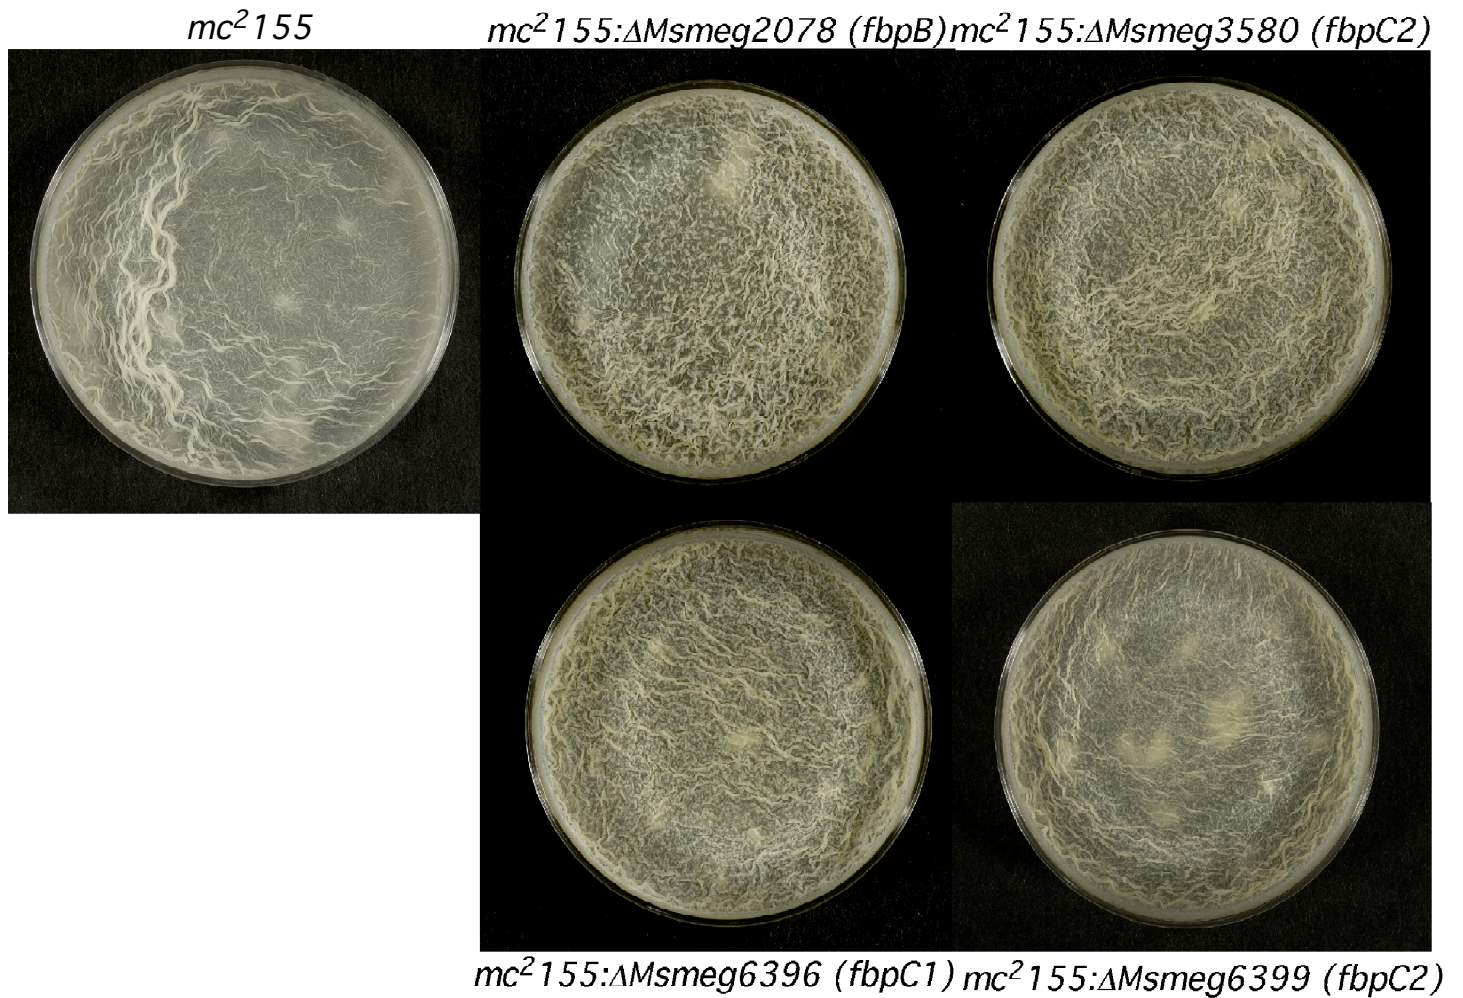

**Figure S3-** 5-day biofilms of *M. smegmatis* mutants each with deletions in one of the four mycolyltransferase homologues. The genotype of the mutant strain against each panel denotes the gene deleted in the mutant.

| Sequence Name | Sequence                                            |
|---------------|-----------------------------------------------------|
| 1529kontF     | CCC AGC GCG GGG ACC TTA AGC GGC GTC GCG CTG GCC GT  |
| 1529kontR     | CAA CCG GGC CGG CTT CTA GAG GGA AAT CAC GAT CGC C   |
| 1529koctF     | CCG CAG GCA GCA GGG CTA GCT CGC GGG TCT GGT TTA GGG |
| 1529koctR     | GGT CAA CGG CAG GCC AAG CTT CGC CGA CGG GTT ACC     |
| 2078kontAfl   | AGT TGT GCA GTG CGC TTA AGC CGA TGG TCC ACG CGC     |
| 2078kontXba   | CAA TGG CCA CGA ATC TAG ACA ATG AAG GTC ATA CTG C   |
| 2078koctNhe   | GCA GCG GGT GCT CGG CTA GCC CCG TAT CAC ACG AAA TC  |
| 2078koctBglII | CGG CTC GGT GGG TGT AGA TCT GCT CTC CGC GCT GGG C   |
| 3580kontAfl   | CCG ACT CGC ATG AGC TTA AGC GTC TCG GGC CGG GTC GG  |
| 3580kontXba   | GTG CGG TCC GCC GCT CTA GAA CTG CAC ACG GAT GTC GC  |
| 3580koctNheI  | GTG GAA CTA CTG GGG CTA GCA GCT GCT GGA GAT GA      |
| 3580koctBglII | CCG CAT CGT CGA GGA GAT CTG CTC AAC CGG CGG GGC C   |
| 6396kontAfl   | TCT ACG CGG CAT CGC TTA AGG GCA CGT TGA ACC CGT C   |
| 6396kontXbaI  | CAC GTC TCA TCC TCT AGA CCT TCC TGC CG              |
| 6396koctNheI  | CTT CCC GGC CTC GGG CTA GCA CGA CTG GGG CAG CTG     |
| 6396koctBglII | CGG ATG TAG TCG GAG ATC TCC GAG TCG ACC TCC CCG G   |
| 6398kontAfl   | CTG ATC CTG TCG GCC TTA AGC CCA GGT CAG TTC CGG TAT |
| 6398kontXba   | GCG ACC GCA ACC GTC TAG ACG GCG CGA CAG ACC TGC CGC |
| 6398koctNheI  | CTG GGC GTA CTG GGG CTA GCA GCT GCA GGC GAT GAA G   |
| 6398koctBglII | CTC GGC GGT GAG AAA GAT CTC CCA CTG CTT GCT GCC GT  |
| 6399kontAfl   | CCC CAC ACA GTG TTT CTT AAG AAC ATG GGC ATG CTG GGC |
| 6399kontXba   | AAT GTG GTG AAC ATT CTA GAA ATG ACT GTC GCC ACC     |
| 6399koctnhe   | GCG GGC AAC CAC GGC TAG CCG TAC TGG GGC GCT CAG C   |
| 6399koctbglII | GGT CTC CCA CTT GTA GAT CTT GCA GCC GCC GTC CTT G   |
| 6583kontbgl   | CGA CAT CCG CGC CCA GAT CTA ATC CCA CTT CTT CGG C   |
| 6583kontnhe   | CGC GAT CAG CCC CGC TAG CAT GAG CAC CGT CGC GGC     |
| 6583koctxbaI  | GCG ACG CGG CCG GTC TAG ACC GGA TCC CGT AAA CC      |
| 6583koctafIII | GAA TCA CCC AGC GGC TTA AGG CCC TCG GCG TCG ACG TG  |

Table S1: List of primers used for constructing allelic exchange substrate (AES) for the deletion of mycolyltransferases and Msmeg\_1529 (TDMH).

| Sequence Name | Sequence                               |
|---------------|----------------------------------------|
| hygprimerF    | AGC GGC TCC CAG AAT TCC TGG TCG TTC    |
| hygprimerR    | GCG AAC TGC TCG CCT TCA CCT TCC TGC AC |
| 1529scrnF     | GGC GCC CAG TTC TTC TAC TAC AAC G      |
| 1529scrnR     | GCC ACG AAA GCG GCG GCC TGA TTC G      |
| 6396scrnF     | GCC AAC CGC GAC GTC AAG CCG A          |
| 6396scrnR     | CTT ACG CCG AGC GTT CTT TGC C          |
| 6398scrnF     | CAA CAA TCA GAC CTA CAC CTA TAA G      |
| 6398scrnR     | CGG CGT CAG GAA ACC CGA CAG            |
| 6399scrnF     | CAA CTA CGA CGT GTG GGA TGT G          |
| 6399scrnR     | CGG CCA TCG ACA GAC CGA CAA C          |

Table S2 : List of primers used to screen the *DfbpA* Msmeg\_1529 mutants of *M. smegmatis*. Hygromycin resistant colonies of each mutant were screened for the presence of 5' and 3' junction sequence between of *hyg<sup>r</sup>* and flanking region using two primer pairs- (hygprimerF, scrnF) and (hygprimerR, scrnR).

| Sequence Name | Sequence                                           |
|---------------|----------------------------------------------------|
| smeg0194expF  | GAA GGG GGA CGT TCC ATA TGA AAT GGA TTA GAG CTC T  |
| smeg0194expR  | ATC AGT TGG TCG CCT CGA GAG GCC CGG TGT TGA TGC    |
| smeg1184expF  | CAT GAG CTA TGG GGC ATA TGA GAC TCG CCG GTC TCG T  |
| smeg1184expR  | GCG CCA CTA GGT CAC TCG AGC GGC GCC GTC GGG GGC    |
| smeg1529expF  | GTG ACG ATG GCG CAT ATG ATT TCC CTC CGG AAG CCG    |
| smeg1529expR  | ATT CGA ATC CCT ACT CGA GAC CCG CGA TCA GCC CTG    |
| smeg2095expF  | CCG GTT AGA TTC ACA TAT GCT TTC TCG CCG GAT CGG    |
| smeg2095expR  | CAC TCA ACA TCA CTC GAG CGG TAG GTC AGC CGA C      |
| smeg5878expF  | ATG CGC TTG GAG TCC ATA TGA ACG TTC TCA AAT T      |
| smeg5878expR  | GGG ATC ACA ACC GCT CGA GCA CGT ACT GCG CGG CCT GG |
| smeg6354expF  | TTT GGG GGT CGG GCA TAT GTT CAA GAG CAC GCT TTC    |
| smeg6354expR  | CCT CCC GCA CTC ACT CGA GCA GGA CTC GCG CGG CGA C  |
| smeg6398expF  | TCA GAT AGG GAG CCA TAT GAA GTT CGT TGG GAG AAT G  |
| smeg6398expR  | TCG CCG GTC CCC GAA AGC TTC CCG GAA ATG ATC GAG CG |
| smeg6398compF | TCA GAT AGG GAG CCA TAT GAA GTT CGT TGG GAG AAT G  |
| smeg1529comF  | GTG ACG ATG GCG CAT ATG ATT TCC CTC CGG AAG CCG    |
| smeg1529compR | ATT CGA ATC CCT ACT CGA GAC CCG CGA TCA GCC CTG    |

Table S3- List of primers used to express six serine esterases and Msmeg\_6398 in *E. coli* in *M. smegmatis*. The primers annotated as “comp” were used for making complementation construct for the respective mutants. smeg6398expR was also used for making complementation construct.
